# Supplementary material for: Epidemiologic and Genetic Associations of Endometriosis With Depression, Anxiety, and Eating Disorders
Source: PubMed Central journal article supplement (PMC9856929; doi:10.1001/jamanetworkopen.2022.51214), 2023-01-18
Supplement: jamanetwopen-e2251214-s001.pdf [file jamanetwopen-e2251214-s001.pdf]

## Supplementary Online Content

Koller D, Pathak GA, Wendt FR, et al. Epidemiologic and genetic associations of endometriosis with depression, anxiety, and eating disorders. *JAMA Netw Open.* 2023;6(1):e2251214. doi:10.1001/jamanetworkopen.2022.51214

**eMethods.** Supplemental Methods

**eTable 1.** Sample Size Distribution of the Psychiatric Traits Investigated

**eTable 2.** Summary of the Multiple Regression Model for the Phenotypic Association of Endometriosis With Depression, Anxiety, and Eating Disorders (ED)

**eTable 3.** LD Independent Genome-Wide Significant Variants in the Endometriosis GWAS Generated From UK Biobank Data

**eTable 4.** Descriptive Statistics and SNV Heritability of the GWASs Generated From UK Biobank Data Using LDSC

**eTable 5.** Genetic Correlation Among Endometriosis and Psychiatric Traits Using SCORE and LDSC and Genetic Correlation Between the Same Traits in Different Cohorts Using LDSC

**eTable 6.** Details of the Polygenic Risk Score Analysis Across All P-Value Thresholds and Traits

**eTable 7.** Results of the Bidirectional One-Sample Mendelian Randomization With Power Analysis and Diagnostic Tests

**eTable 8.** Results With a Theta P-Value of  $<0.05$  of the SNV-Level Pleiotropy Analysis

**eTable 9.** Gene-Based Analysis for  $R < 0.05$  SNVs in the Pleiotropy Analysis Using the Versatile Gene-Based Association Study (VEGAS) 2 Tool

**eTable 10.** Pathway Analysis Based on the Gene-Based Analysis Using the Versatile Gene-Based Association Study (VEGAS) 2 Tool

**eTable 11.** Association of the rs1266606 Variant With Sex-Stratified Phenotypic Traits in the UK Biobank

**eTable 12.** Association of the rs1266606 Variant With Phenotypic Traits Available From the GWAS Atlas

This supplementary material has been provided by the authors to give readers additional information about their work.

## **eMethods.** Supplemental Methods

### *Self-reported and ICD code phenotype definitions*

The ICD10-N80 endometriosis diagnostic criteria include all endometriosis localizations including the ovaries, uterus, fallopian tube, pelvic peritoneum, pelvic sidewall, cul-de-sac, pelvic brim, intestine, rectovaginal septum and vagina, and ureter. The self-reported definition was derived from an assessment conducted by a trained nurse who explained the condition to the participants and registered their response. Before quality control, the total number of endometriosis cases in UKB was 5,308 for ICD codes, and 4,590 for self-reported criteria. Considering the overlap between ICD codes and self-reported diagnoses, in total 8,710 individuals were considered. After quality control, 5% of the sample was removed due to the exclusion of related individuals, and 8,276 cases were included in the subsequent analyses.

A total of 14,397 female depression cases were detected based on F32 ICD code (N=8,368), and self-reported depression (N=12,912). For anxiety, the 5,989 cases derived from the ICD10-F41 code (N=4,214), the ICD10-phecode 300 (F06, F34, F40, F41, F42, F43, F48, F93, F99, R45, N=4,901) and self-reported anxiety/panic attacks (N=3,832). We defined 591 female cases of eating disorders based on the ICD-10-R63 code for anorexia (N=504) and self-reported anorexia/bulimia/other eating disorder (N=284).

### *Logistic regression – phenotype association*

Model 1 included age as covariate; Model 2 additionally adjusted for body mass index (BMI), Townsend deprivation index at recruitment, age at menarche, and length of menstrual cycle; Model 3 included all covariates in Model 2 and ever taken oral contraceptive pill, back pain for 3+ months, stomach/abdominal pain for 3+ months, medication for pain relief, constipation, heartburn, pain type(s) experienced in last month, ever diagnosed with irritable bowel syndrome, frequency of discomfort/pain in abdomen in last 3 months, discomfort/pain occurring only during menstrual bleed, abdominal discomfort/pain for 6 months or longer, frequency of discomfort/pain getting better or stopping after a bowel movement, more frequent bowel movements when abdominal discomfort/pain started, severity of current abdominal pain, and number of days (out of 10) with abdominal pain; Model 4 included all covariates in Model 3 together with the other psychiatric traits to investigate whether the association was due to the comorbidity among the three psychiatric disorders investigated (e.g., when endometriosis was tested with respect to anxiety, the Model 4 included depression and eating disorder as covariates together with the other covariates included in Model 3).

### *Data sources for genetic correlation and polygenic risk scoring*

We used GWAS data from previous large-scale studies to investigate further the genetic effects linking endometriosis to depression, anxiety and eating disorders. To avoid sample overlap bias, the GWAS were selected only if they did not include the UKB cohort. For endometriosis, we selected genome-wide data generated by the FinnGen Study (Freeze 6)<sup>1</sup> considering an ICD-based definition ( $N_{\text{cases}} = 10,029$ ,  $N_{\text{controls}} = 81,593$ ). For eating disorders, we used data generated from the Psychiatric Genomic Consortium (PGC), which meta-analyzed cohorts with a lifetime

diagnosis of anorexia nervosa, bulimia nervosa, or other eating disorders (3,495 cases and 10,982 controls)<sup>2</sup>. Although a larger eating-disorder GWAS is available<sup>3</sup>, we could not use this dataset in the present study due to sample overlap with the UKB. For depression and anxiety, we used GWAS data generated from the Million Veteran Program (MVP)<sup>4</sup>. Briefly, anxiety was assessed using the GAD-2 scale in a total of 241,541 MVP participants<sup>5</sup>, while MVP depression ( $N_{\text{cases}} = 83,810$ ,  $N_{\text{controls}} = 166,405$ ) was defined by combining self-reported information, ICD codes, and a 2-item Patient Health Questionnaire-9 scale<sup>4</sup>. To investigate the potential role of inflammation in the psychiatric comorbidities of endometriosis, we also used GWAS data generated from the CHARGE (Cohorts for Heart and Aging Research in Genomic Epidemiology) consortium, which investigated circulating C-reactive protein (CRP) in 204,402 individuals<sup>6</sup>.

### *One-sample Mendelian Randomization*

Polygenic risk scoring: Prior to computing the PRS, SNVs were filtered to include those with imputation info score  $\geq 0.8$ , and minor allele frequency  $\geq 0.01$ . UKB individual-level data were used as target data for each phenotype. Analyses were adjusted for age and the first 10 within-ancestry PCs. Multiple genome-wide association p-value thresholds were considered (PT:  $5 \times 10^{-8}$ ,  $10^{-7}$ ,  $10^{-6}$ ,  $10^{-5}$ ,  $10^{-4}$ , .001, 0.05, 0.1, 0.2, 0.3, 0.4, 0.5, 1) for SNV inclusion and LD cut-off of  $R^2=0.1$  within a 250-kb window as clumping criteria. The Major Histocompatibility Complex region of the genome was excluded because of its complex LD structure.

Sensitivity analyses: To verify that our analysis does not violate the MR assumptions, we conducted sensitivity analyses specifically designed for one-sample MR studies. Specifically, weak-instrument and Wu-Hausman tests were performed to evaluate whether the instruments

have a low correlation with the explanatory variable and whether the instrumental variables are as consistent as the ordinary least squares, respectively. A power analysis was also performed using the mRnd online tool<sup>7</sup>. The  $R^2$  for each variant was calculated using the following formula:  $R^2 = 2 \times \text{Beta}^2 \times \text{MAF} \times (1 - \text{MAF})$ , where MAF is the minor allele frequency in the UKB European ancestry participants.

Phenome-wide association study: To characterize further the rs12666606 pleiotropic variant, we performed a phenome-wide association study (PheWAS) of 3,287 phenotypes assessed in up to 194,174 female UKB participants (eTable 11 in the Supplement). Additionally, we also explored rs12666606 associations in the GWAS atlas<sup>8</sup>. We applied False Discovery Rate (FDR;  $q < 0.05$ )<sup>9</sup> accounting for the number of phenotypes tested to identify associations surviving multiple testing correction.

## eResults

### *Phenome-wide association study*

Considering female UKB participants (N=194,174), 160 traits were nominally associated with *DGKB*\*rs12666606. Although no association survived multiple testing correction (FDR  $q < 0.05$ , eTable 11 in the Supplement), the top results included enterocolitis due to *Clostridium difficile* (beta=0.001,  $p=4 \times 10^{-4}$ ), dorsalgia (beta=0.006,  $p=5 \times 10^{-4}$ ), maximum heart rate during fitness test (beta=0.084,  $p=8 \times 10^{-4}$ ), other and unspecified granulomatous disorders of skin and subcutaneous tissue (beta=0.001,  $p=8 \times 10^{-4}$ ), zumenon 1mg tablet (beta=0.001,  $p=9 \times 10^{-4}$ ), and low back pain

(beta=0.004, p=0.001). Considering sex-combined data available from the GWAS atlas<sup>8</sup>, we did not identify any association surviving multiple testing correction (eTable 12 in Supplement 2).

## eReferences

1. Mitja I, Kurki JK, Priit Palta, et al. FinnGen: Unique genetic insights from combining isolated population and national health register data. *medRxiv*. 2022;doi:10.1101/2022.03.03.22271360
2. Duncan L, Yilmaz Z, Gaspar H, et al. Significant Locus and Metabolic Genetic Correlations Revealed in Genome-Wide Association Study of Anorexia Nervosa. *Am J Psychiatry*. Sep 1 2017;174(9):850-858. doi:10.1176/appi.ajp.2017.16121402
3. Watson HJ, Yilmaz Z, Thornton LM, et al. Genome-wide association study identifies eight risk loci and implicates metabo-psychiatric origins for anorexia nervosa. *Nat Genet*. Aug 2019;51(8):1207-1214. doi:10.1038/s41588-019-0439-2
4. Levey DF, Stein MB, Wendt FR, et al. Bi-ancestral depression GWAS in the Million Veteran Program and meta-analysis in >1.2 million individuals highlight new therapeutic directions. *Nat Neurosci*. Jul 2021;24(7):954-963. doi:10.1038/s41593-021-00860-2
5. Levey DF, Gelernter J, Polimanti R, et al. Reproducible Genetic Risk Loci for Anxiety: Results From approximately 200,000 Participants in the Million Veteran Program. *Am J Psychiatry*. Mar 1 2020;177(3):223-232. doi:10.1176/appi.ajp.2019.19030256
6. Ligthart S, Vaez A, Vosa U, et al. Genome Analyses of >200,000 Individuals Identify 58 Loci for Chronic Inflammation and Highlight Pathways that Link Inflammation and Complex Disorders. *Am J Hum Genet*. Nov 1 2018;103(5):691-706. doi:10.1016/j.ajhg.2018.09.009
7. Brion MJ, Shakhbazov K, Visscher PM. Calculating statistical power in Mendelian randomization studies. *Int J Epidemiol*. Oct 2013;42(5):1497-501. doi:10.1093/ije/dyt179
8. Watanabe K, Stringer S, Frei O, et al. A global overview of pleiotropy and genetic architecture in complex traits. *Nat Genet*. Sep 2019;51(9):1339-1348. doi:10.1038/s41588-019-0481-0
9. Benjamini YH, Y. Controlling the False Discovery Rate: A Practical and Powerful Approach to Multiple Testing. *Journal of the Royal Statistical Society: Series B (Methodological)*. 1995;doi:10.1111/j.2517-6161.1995.tb02031.x

**eTable 1.** Sample Size Distribution of the Psychiatric Traits Investigated

| Trait             | Detailed description                                                                                                                                                                                                                                                                  | UKB phenotype code | ICD codes included                               | Ncases among endometriosis cases | Ncases |
|-------------------|---------------------------------------------------------------------------------------------------------------------------------------------------------------------------------------------------------------------------------------------------------------------------------------|--------------------|--------------------------------------------------|----------------------------------|--------|
| Anorexia          | Anorexia, loss of appetite. Excludes: anorexia nervosa (F50.0), loss of appetite of nonorganic origin (F50.89), bulimia not otherwise specified (F50.2).                                                                                                                              | 260.6              | R63                                              | 23                               | 504    |
| Anxiety disorders | F06: Anxiety disorder due to known physiological condition, F34: persistent mood disorders, F40: phobic anxiety disorders, F41: other anxiety disorders, F42: obsessive-compulsive disorder, F43: reaction to severe stress, and adjustment disorders, F48: Other nonpsychotic mental | 300                | F06, F34, F40, F41, F42, F43, F48, F93, F99, R45 | 165                              | 4901   |

|                                                     |                                                                                                                                                                                                                                           |     |     |     |      |
|-----------------------------------------------------|-------------------------------------------------------------------------------------------------------------------------------------------------------------------------------------------------------------------------------------------|-----|-----|-----|------|
|                                                     | disorders, F93: Separation anxiety disorder of childhood, F99: Mental disorder, not otherwise specified, R45: Symptoms and signs involving emotional state.                                                                               |     |     |     |      |
| Diagnoses - main ICD10: F41 Other anxiety disorders | Other anxiety disorders: Panic disorder, Generalized anxiety disorder, Other mixed anxiety disorders, Other specified anxiety disorders, anxiety disorder unspecified.                                                                    | F41 | F41 | 245 | 4214 |
| Diagnoses - main ICD10: F32 Depressive episode      | Depressive episode: Major depressive disorder, single episode, mild, Major depressive disorder, single episode, moderate, Major depressive disorder, single episode, severe without psychotic features, Major depressive disorder, single | F32 | F32 | 434 | 8368 |



|                                                                                |                                                                                                                                                                                                                                                                                                                                                           |            |    |    |     |
|--------------------------------------------------------------------------------|-----------------------------------------------------------------------------------------------------------------------------------------------------------------------------------------------------------------------------------------------------------------------------------------------------------------------------------------------------------|------------|----|----|-----|
|                                                                                | episode, severe with psychotic features, Major depressive disorder, single episode, in partial remission, Major depressive disorder, single episode, in full remission, Other depressive episodes: Premenstrual dysphoric disorder, Other specified depressive episodes, Major depressive disorder, single episode, unspecified, Depression, unspecified. |            |    |    |     |
| Non-cancer illness code, self-reported: anorexia/bulimia/other eating disorder | Code for non-cancer illness. If the participant was uncertain of the type of illness they had had, then they described it to the interviewer (a trained nurse) who attempted to place it within the coding tree. If the illness                                                                                                                           | 20002_1470 | NA | 10 | 284 |

|                                                                      |                                                                                                                                                                                                                                                                                                                                                               |                   |           |           |             |
|----------------------------------------------------------------------|---------------------------------------------------------------------------------------------------------------------------------------------------------------------------------------------------------------------------------------------------------------------------------------------------------------------------------------------------------------|-------------------|-----------|-----------|-------------|
|                                                                      | <p>could not be located in the coding tree then the interviewer entered a free-text description of it. These free-text descriptions were subsequently examined by a doctor and, where possible, matched to entries in the coding tree. Free-text descriptions which could not be matched with very high probability have been marked as "unclassifiable".</p> |                   |           |           |             |
| <p>Non-cancer illness code, self-reported: anxiety/panic attacks</p> | <p>Code for non-cancer illness. If the participant was uncertain of the type of illness they had had, then they described it to the interviewer (a trained nurse) who attempted to place it within the coding tree. If the illness could not be located</p>                                                                                                   | <p>20002_1287</p> | <p>NA</p> | <p>85</p> | <p>3832</p> |

|                                                    |                                                                                                                                                                                                                                                                                                                                          |            |    |     |       |
|----------------------------------------------------|------------------------------------------------------------------------------------------------------------------------------------------------------------------------------------------------------------------------------------------------------------------------------------------------------------------------------------------|------------|----|-----|-------|
|                                                    | <p>in the coding tree then the interviewer entered a free-text description of it. These free-text descriptions were subsequently examined by a doctor and, where possible, matched to entries in the coding tree. Free-text descriptions which could not be matched with very high probability have been marked as "unclassifiable".</p> |            |    |     |       |
| Non-cancer illness code, self-reported: depression | <p>Code for non-cancer illness. If the participant was uncertain of the type of illness they had had, then they described it to the interviewer (a trained nurse) who attempted to place it within the coding tree. If the illness could not be located in the coding tree</p>                                                           | 20002_1286 | NA | 419 | 12912 |

|                       |                                                                                                                                                                                                                                                                                                                       |                                                        |  |  |  |
|-----------------------|-----------------------------------------------------------------------------------------------------------------------------------------------------------------------------------------------------------------------------------------------------------------------------------------------------------------------|--------------------------------------------------------|--|--|--|
|                       | <p>then the interviewer entered a free-text description of it. These free-text descriptions were subsequently examined by a doctor and, where possible, matched to entries in the coding tree. Free-text descriptions which could not be matched with very high probability have been marked as "unclassifiable".</p> |                                                        |  |  |  |
|                       |                                                                                                                                                                                                                                                                                                                       |                                                        |  |  |  |
| <b>Combined trait</b> | <b>Ncases</b>                                                                                                                                                                                                                                                                                                         | <b>Overlap between ICD and self-reported diagnoses</b> |  |  |  |
| Depression            | 14397                                                                                                                                                                                                                                                                                                                 | 67%                                                    |  |  |  |
| Anxiety               | 5989                                                                                                                                                                                                                                                                                                                  | 46%                                                    |  |  |  |
| Eating disorders      | 591                                                                                                                                                                                                                                                                                                                   | 75%                                                    |  |  |  |

**eTable 2.** Summary of the Multiple Regression Model for the Phenotypic Association of Endometriosis With Depression, Anxiety, and Eating Disorders (ED)

The estimates are compared between models.

| <b>Model 1</b> | <b>Estimate</b> | <b>SE</b> | <b>z value</b> | <b>P</b> | <b>OR</b> | <b>2.5%</b> | <b>97.5%</b> |
|----------------|-----------------|-----------|----------------|----------|-----------|-------------|--------------|
| Depression     | 1.486           | 0.040     | 36.692         | <2e-16   | 4.536     | 4.419       | 4.784        |
| Anxiety        | 1.209           | 0.063     | 19.048         | <2e-16   | 3.350     | 2.958       | 3.794        |
| ED             | 1.614           | 0.197     | 8.203          | <2e-16   | 5.021     | 3.415       | 7.384        |
| <b>Model 2</b> | <b>Estimate</b> | <b>SE</b> | <b>z value</b> | <b>P</b> | <b>OR</b> | <b>2.5%</b> | <b>97.5%</b> |
| Depression     | 1.421           | 0.041     | 34.617         | <2e-16   | 4.141     | 3.821       | 4.488        |
| Anxiety        | 1.150           | 0.064     | 17.979         | <2e-16   | 3.157     | 2.785       | 3.578        |
| ED             | 1.590           | 0.198     | 8.014          | 1.11E-15 | 4.906     | 3.325       | 7.238        |
| <b>Model 3</b> | <b>Estimate</b> | <b>SE</b> | <b>z value</b> | <b>P</b> | <b>OR</b> | <b>2.5%</b> | <b>97.5%</b> |
| Depression     | 1.296           | 0.042     | 31.055         | <2e-16   | 3.653     | 3.367       | 3.965        |
| Anxiety        | 0.993           | 0.065     | 15.307         | <2e-16   | 2.700     | 2.378       | 3.067        |
| ED             | 1.399           | 0.201     | 6.948          | 3.71E-12 | 4.053     | 2.731       | 6.015        |
| <b>Model 4</b> | <b>Estimate</b> | <b>SE</b> | <b>z value</b> | <b>P</b> | <b>OR</b> | <b>2.5%</b> | <b>97.5%</b> |
| Depression     | 1.319           | 0.050     | 26.181         | <2e-16   | 3.609     | 3.322       | 3.921        |
| Anxiety        | 0.960           | 0.066     | 14.609         | <2e-16   | 2.612     | 2.296       | 2.971        |
| ED             | 1.079           | 0.207     | 5.220          | 1.79E-07 | 2.943     | 1.962       | 4.414        |

Model 1 covariates: age.

Model 2 covariates: age, BMI, socioeconomic status, age at menarche, length of menstrual cycle.

Model 3 covariates: model 2 covariates + ever taken oral contraceptive pill, medication for pain relief, constipation, heartburn, irritable bowel syndrome, pain phenotypes.

Model 4 covariates: model 3 covariates + other psychiatric diagnoses.

**eTable 3.** LD Independent Genome-Wide Significant Variants in the Endometriosis GWAS Generated From UK Biobank Data

| <b>SNV</b> | <b>Chromosome</b> | <b>Position</b> | <b>Allele 1</b> | <b>Allele 2</b> | <b>OR</b> | <b>P value</b> |
|------------|-------------------|-----------------|-----------------|-----------------|-----------|----------------|
| rs7521902  | 1                 | 22490724        | A               | C               | 1.125     | 2.50E-09       |
| rs6432220  | 2                 | 11710716        | A               | G               | 0.901     | 3.57E-08       |
| rs10013228 | 4                 | 55997340        | G               | A               | 0.898     | 3.39E-08       |
| rs12173791 | 6                 | 151824449       | A               | G               | 1.182     | 1.54E-08       |
| rs12110523 | 6                 | 152556258       | C               | T               | 1.132     | 3.58E-09       |
| rs4071558  | 11                | 30344591        | T               | C               | 0.842     | 2.35E-12       |

**eTable 4.** Descriptive Statistics and SNV Heritability of the GWASs Generated From UK Biobank Data Using LDSC

| Trait         | h2     | se     | z score    | lambda GC | Mean $\chi^2$ | Intercept | se      | Ratio  | se      |
|---------------|--------|--------|------------|-----------|---------------|-----------|---------|--------|---------|
| Endometriosis | 0.0859 | 0.015  | 5.72666667 | 1.0618    | 1.0769        | 1.0192    | -0.0071 | 0.2498 | -0.0923 |
| Depression    | 0.0295 | 0.0025 | 11.8000    | 1.1270    | 1.1367        | 1.0035    | 0.0073  | 0.0260 | 0.0533  |
| Anxiety       | 0.0124 | 0.0022 | 5.6364     | 1.0649    | 1.0658        | 1.0069    | 0.0067  | 0.1050 | 0.1014  |
| ED            | 0.0001 | 0.0018 | 0.0556     | 1.0135    | 1.0097        | 1.0091    | 0.0060  | 0.9343 | 0.6154  |

**eTable 5.** Genetic Correlation Among Endometriosis and Psychiatric Traits Using SCORE and LDSC and Genetic Correlation Between the Same Traits in Different Cohorts Using LDSC

| <b>SCORE - without psychiatric covariates</b> |                       |           |           |          |                |
|-----------------------------------------------|-----------------------|-----------|-----------|----------|----------------|
| <b>p1</b>                                     | <b>p2</b>             | <b>rg</b> | <b>se</b> | <b>z</b> | <b>p value</b> |
| UKB endometriosis                             | UKB depression        | 0.364     | 0.061     | 5.934    | 1.5E-09        |
| UKB endometriosis                             | UKB anxiety           | 0.334     | 0.079     | 4.229    | 1.17E-05       |
| UKB endometriosis                             | UKB eating disorders  | 0.609     | 0.310     | 1.962    | 0.025          |
| <b>SCORE - with covariates</b>                |                       |           |           |          |                |
| <b>p1</b>                                     | <b>p2</b>             | <b>rg</b> | <b>se</b> | <b>z</b> | <b>p value</b> |
| UKB endometriosis                             | UKB depression        | 0.341     | 0.068     | 4.989    | 3.04E-07       |
| UKB endometriosis                             | UKB anxiety           | 0.261     | 0.099     | 2.644    | 4.10E-03       |
| UKB endometriosis                             | UKB eating disorders  | 0.589     | 0.381     | 1.546    | 0.061          |
| <b>LDSC</b>                                   |                       |           |           |          |                |
| <b>p1</b>                                     | <b>p2</b>             | <b>rg</b> | <b>se</b> | <b>z</b> | <b>p value</b> |
| UKB endometriosis                             | UKB depression        | 0.362     | 0.101     | 3.581    | 3.00E-04       |
| UKB endometriosis                             | UKB anxiety           | 0.375     | 0.129     | 2.895    | 3.80E-03       |
| <b>LDSC - between different cohorts</b>       |                       |           |           |          |                |
| <b>p1</b>                                     | <b>p2</b>             | <b>rg</b> | <b>se</b> | <b>z</b> | <b>p value</b> |
| UKB endometriosis                             | FinnGen endometriosis | 1.169     | 0.143     | 8.188    | 2.66E-16       |
| UKB depression                                | MVP depression        | 0.814     | 0.030     | 26.919   | 1.32E-159      |
| UKB anxiety                                   | MVP anxiety           | 0.724     | 0.106     | 6.825    | 8.78E-12       |
| UKB CRP                                       | CHARGE CRP            | 0.990     | 0.029     | 34.515   | 4.77E-261      |



**eTable 6.** Details of the Polygenic Risk Score Analysis Across All P-Value Thresholds and Traits

| Phenotype     | P-value Threshold | R <sup>2</sup> | P-value   | Coefficient | Standard Error | Number of SNVs |
|---------------|-------------------|----------------|-----------|-------------|----------------|----------------|
| Endometriosis | 0.0001            | 7.71E-05       | 0.057     | 1.61        | 0.845          | 2              |
|               | 0.001             | 2.12E-05       | 0.318     | 2.59        | 2.591          | 19             |
|               | 0.05              | 1.13E-04       | 0.021     | 38.23       | 16.570         | 438            |
|               | 0.1               | 4.23E-05       | 0.158     | 31.72       | 22.491         | 730            |
|               | 0.2               | 5.34E-05       | 0.113     | 49.29       | 31.125         | 1170           |
|               | 0.3               | 2.57E-05       | 0.272     | 42.38       | 38.560         | 1548           |
|               | 0.4               | 1.91E-05       | 0.344     | 42.50       | 44.882         | 1862           |
|               | 0.5               | 2.59E-05       | 0.270     | 55.72       | 50.539         | 2133           |
|               | 1                 | 3.48E-05       | 0.201     | 87.87       | 68.746         | 2953           |
| Depression    | 5E-08             | 2.86E-03       | 1.58E-59  | 139.97      | 8.602          | 165            |
|               | 1E-07             | 2.91E-03       | 1.45E-60  | 150.99      | 9.197          | 187            |
|               | 1E-06             | 4.81E-03       | 2.76E-99  | 299.92      | 14.181         | 354            |
|               | 1E-05             | 8.01E-03       | 9.93E-164 | 638.04      | 23.398         | 726            |
|               | 0.0001            | 0.0125         | 1.94E-253 | 1385.02     | 40.731         | 1656           |
|               | 0.001             | 0.0233         | <1E-300   | 3788.96     | 81.604         | 4718           |
|               | 0.05              | 0.0596         | <1E-300   | 25093.00    | 342.150        | 46124          |
|               | 0.1               | 0.0672         | <1E-300   | 35427.00    | 456.564        | 71675          |
|               | 0.2               | 0.0735         | <1E-300   | 50212.60    | 619.959        | 110765         |
|               | 0.3               | 0.0761         | <1E-300   | 61774.40    | 750.719        | 142026         |
|               | 0.4               | 0.0776         | <1E-300   | 71602.90    | 862.293        | 167861         |
|               | 0.5               | 0.0783         | <1E-300   | 80020.30    | 959.612        | 189776         |
|               | 1                 | 0.0790         | <1E-300   | 106541.00   | 1272.390       | 255350         |
| Anxiety       | 5E-08             | 3.99E-05       | 0.132     | 3.33        | 2.211          | 5              |
|               | 1E-07             | 2.21E-05       | 0.262     | 2.75        | 2.453          | 6              |
|               | 1E-06             | 1.38E-05       | 0.376     | -3.33       | 3.759          | 18             |

|                           |        |          |          |          |          |        |
|---------------------------|--------|----------|----------|----------|----------|--------|
|                           | 1E-05  | 1.16E-05 | 0.416    | 7.53     | 9.254    | 82     |
|                           | 0.0001 | 2.22E-04 | 3.79E-04 | 82.78    | 23.289   | 398    |
|                           | 0.001  | 8.21E-04 | 8.20E-12 | 415.13   | 60.735   | 2172   |
|                           | 0.05   | 1.37E-03 | 1.09E-18 | 3012.27  | 341.327  | 44499  |
|                           | 0.1    | 1.18E-03 | 2.60E-16 | 3838.62  | 468.673  | 74953  |
|                           | 0.2    | 1.16E-03 | 4.72E-16 | 5333.57  | 656.968  | 124148 |
|                           | 0.3    | 1.13E-03 | 1.07E-15 | 6494.30  | 809.955  | 165139 |
|                           | 0.4    | 1.21E-03 | 1.19E-16 | 7808.00  | 942.474  | 199929 |
|                           | 0.5    | 1.18E-03 | 2.35E-16 | 8699.42  | 1060.580 | 229796 |
|                           | 1      | 1.17E-03 | 3.69E-16 | 11853.30 | 1454.690 | 321526 |
| <b>Anorexia nervosa</b>   | 5E-08  | 8.26E-05 | 0.367    | 0.53     | 0.593    | 1      |
|                           | 1E-07  | 1.06E-04 | 0.307    | 0.90     | 0.882    | 2      |
|                           | 1E-06  | 6.94E-06 | 0.794    | -0.34    | 1.312    | 4      |
|                           | 1E-05  | 2.15E-04 | 0.145    | 5.55     | 3.811    | 27     |
|                           | 0.0001 | 2.39E-04 | 0.125    | 16.72    | 10.896   | 182    |
|                           | 0.001  | 5.51E-05 | 0.462    | 24.78    | 33.661   | 1362   |
|                           | 0.05   | 1.06E-03 | 1.25E-03 | 656.72   | 203.521  | 33521  |
|                           | 0.1    | 8.63E-04 | 3.57E-03 | 818.01   | 280.710  | 56954  |
|                           | 0.2    | 8.73E-04 | 3.37E-03 | 1154.87  | 393.973  | 94980  |
|                           | 0.3    | 9.23E-04 | 2.59E-03 | 1465.57  | 486.485  | 126719 |
|                           | 0.4    | 9.13E-04 | 2.73E-03 | 1695.11  | 565.641  | 153333 |
|                           | 0.5    | 9.22E-04 | 2.62E-03 | 1874.58  | 623.079  | 175695 |
|                           | 1      | 1.14E-03 | 8.36E-04 | 2811.07  | 841.479  | 242016 |
| <b>C-reactive protein</b> | 5E-08  | 0.0155   | <1E-300  | 278.01   | 5.019    | 170    |
|                           | 1E-07  | 0.0158   | <1E-300  | 304.56   | 5.445    | 187    |
|                           | 1E-06  | 0.0162   | <1E-300  | 385.99   | 6.806    | 248    |
|                           | 1E-05  | 0.0170   | <1E-300  | 588.10   | 10.121   | 398    |
|                           | 0.0001 | 0.0166   | <1E-300  | 1021.27  | 17.768   | 801    |

|  |       |          |         |          |          |        |
|--|-------|----------|---------|----------|----------|--------|
|  | 0.001 | 0.0152   | <1E-300 | 2572.51  | 46.887   | 2638   |
|  | 0.05  | 0.0104   | <1E-300 | 14539.10 | 321.665  | 40722  |
|  | 0.1   | 9.75E-03 | <1E-300 | 19760.20 | 450.740  | 67338  |
|  | 0.2   | 8.97E-03 | <1E-300 | 26773.10 | 636.647  | 109405 |
|  | 0.3   | 8.64E-03 | <1E-300 | 32363.50 | 784.558  | 143480 |
|  | 0.4   | 8.49E-03 | <1E-300 | 37131.30 | 908.259  | 171631 |
|  | 0.5   | 8.41E-03 | <1E-300 | 41465.70 | 1018.850 | 195825 |
|  | 1     | 8.36E-03 | <1E-300 | 55369.90 | 1364.930 | 266393 |

**eTable 7.** Results of the Bidirectional One-Sample Mendelian Randomization With Power Analysis and Diagnostic Tests

| Exposure -> Outcome         | Estimate  | SE       | t-value | P-value  | OR    | 2.5%CI | 97.5%CI | R2       | Power | NCP   | F-statistic |
|-----------------------------|-----------|----------|---------|----------|-------|--------|---------|----------|-------|-------|-------------|
| Endometriosis -> Depression | 0.511     | 0.782    | 0.653   | 0.514    | 1.667 | 0.360  | 2.974   | 1.46E-04 | 0.11  | 0.52  | 14.38       |
| Endometriosis -> Anxiety    | 0.423     | 0.532    | 0.796   | 0.426    | 1.527 | 0.539  | 2.516   | 1.46E-04 | 0.09  | 0.33  | 14.38       |
| Endometriosis -> ED         | 0.043     | 0.159    | 0.27    | 0.787    | 1.044 | 0.764  | 1.324   | 1.46E-04 | 0.05  | 0     | 14.38       |
| Anxiety -> Endometriosis    | 0.330     | 0.104    | 3.171   | 1.52E-03 | 1.391 | 1.134  | 1.647   | 2.40E-03 | 1     | 70.84 | 582.09      |
| Depression -> Endometriosis | 0.087     | 0.007    | 13.027  | <2e-16   | 1.091 | 1.077  | 1.106   | 0.015    | 1     | 28.33 | 1735        |
| ED -> Endometriosis         | -1.464    | 0.929    | -1.575  | 0.115    | 0.733 | 0.037  | 1.428   | 1.06E-04 | 0.05  | 0.02  | 2.53        |
| CRP -> Endometriosis        | -4.13E-04 | 7.00E-04 | -0.590  | 0.555    | 1.000 | 0.998  | 1.001   | 0.043    | 1     | 59.95 | 492.74      |

| Diagnostic tests            |                  | df1 | df2    | F statistic | p-value  |
|-----------------------------|------------------|-----|--------|-------------|----------|
| Endometriosis -> Anxiety    | Weak instruments | 1   | 194527 | 5.328       | 0.021    |
|                             | Wu-Hausman       | 1   | 194526 | 0.645       | 0.422    |
| Endometriosis -> Depression | Weak instruments | 1   | 194527 | 5.328       | 0.021    |
|                             | Wu-Hausman       | 1   | 194526 | 0.375       | 0.54     |
| Endometriosis -> ED         | Weak instruments | 1   | 194527 | 5.328       | 0.021    |
|                             | Wu-Hausman       | 1   | 194526 | 0.074       | 0.785    |
| Anxiety -> Endometriosis    | Weak instruments | 1   | 194527 | 7695        | <2e-16   |
|                             | Wu-Hausman       | 1   | 194526 | 120.5       | <2e-16   |
| Depression -> Endometriosis | Weak instruments | 1   | 194527 | 78.01       | <2e-16   |
|                             | Wu-Hausman       | 1   | 194526 | 10.39       | 1.27E-03 |

|                                |                         |   |        |          |          |
|--------------------------------|-------------------------|---|--------|----------|----------|
| <b>ED -&gt; Endometriosis</b>  | <b>Weak instruments</b> | 1 | 194527 | 11.153   | 8.39E-04 |
|                                | <b>Wu-Hausman</b>       | 1 | 194526 | 3.188    | 0.074    |
| <b>CRP -&gt; Endometriosis</b> | <b>Weak instruments</b> | 1 | 194527 | 3376.287 | <2e-16   |
|                                | <b>Wu-Hausman</b>       | 1 | 194526 | 2.462    | 0.117    |

**eTable 8.** Results With a Theta P-Value of <0.05 of the SNV-Level Pleiotropy Analysis  
 Nominally Significant (Theta P-Value <0.05) Variants Between Endometriosis And Psychiatric Traits Are Highlighted In Green.

| SNV        | Endometriosis z-score | Depression z-score | Anxiety z-score | Eating disorders z-score | r      | angle | r p-value | r q-value | theta p-value | theta q-value |
|------------|-----------------------|--------------------|-----------------|--------------------------|--------|-------|-----------|-----------|---------------|---------------|
| rs12666606 | -9.455                | 8.096              | 0.006           | 0.102                    | 12.448 | 2.124 | 2.26E-34  | 9.25E-32  | 5.56E-08      | 4.95E-04      |
| rs28699022 | 0.006                 | 15.451             | 0.018           | -6.574                   | 16.792 | 1.207 | 5.92E-62  | 3.24E-59  | 1.31E-06      | 5.83E-03      |
| rs12294968 | -0.008                | -0.058             | 81.174          | -27.434                  | 85.685 | 0.978 | 0         | 0         | 2.47E-06      | 7.34E-03      |
| rs51500    | -0.032                | -11.144            | -0.013          | -6.510                   | 12.906 | 1.586 | 6.74E-37  | 2.86E-34  | 3.31E-06      | 7.37E-03      |
| rs2864004  | -0.038                | 6.037              | 0.010           | -11.123                  | 12.656 | 1.492 | 1.66E-35  | 6.91E-33  | 2.04E-05      | 0.036         |
| rs2159023  | -6.260                | -0.072             | 0.210           | -6.397                   | 8.953  | 2.325 | 3.94E-18  | 1.17E-15  | 4.90E-05      | 0.073         |
| rs2286286  | 0.012                 | 0.028              | -12.069         | -5.266                   | 13.167 | 1.234 | 2.24E-38  | 9.71E-36  | 1.53E-04      | 0.194         |

**eTable 9.** Gene-Based Analysis for  $R < 0.05$  SNVs in the Pleiotropy Analysis Using the Versatile Gene-Based Association Study (VEGAS) 2 Tool

The rs12666606 shared SNV between endometriosis and depression was mapped to the DGKB gene. Genes with a p-value  $< 0.05$  are listed in the table.

| Chromosome | Gene   | N SNVs | Start     | Stop      | Test statistic | p value  | q value  | Top SNV    | Top SNV p value |
|------------|--------|--------|-----------|-----------|----------------|----------|----------|------------|-----------------|
| 7          | DGKB   | 6      | 14184673  | 14881075  | 29.511         | 1.00E-06 | 8.25E-04 | rs12666606 | 5.56E-08        |
| 11         | DLG2   | 7      | 83166055  | 85338314  | 22.190         | 1.60E-05 | 6.60E-03 | rs12294968 | 2.47E-06        |
| 4          | CRMP1  | 2      | 5822490   | 5894810   | 14.335         | 2.95E-04 | 0.081    | rs2286286  | 1.53E-04        |
| 12         | BTBD11 | 2      | 107712196 | 108053419 | 8.207          | 0.011    | 1        | rs4964583  | 4.17E-03        |
| 13         | HS6ST3 | 3      | 96743092  | 97491816  | 7.501          | 0.017    | 1        | rs1927796  | 6.17E-03        |
| 2          | MREG   | 3      | 216807313 | 216878346 | 6.544          | 0.030    | 1        | rs3770551  | 0.011           |
| 12         | CNTN1  | 2      | 41086243  | 41466213  | 5.523          | 0.032    | 1        | rs11178843 | 0.019           |

**eTable 10.** Pathway Analysis Based on the Gene-Based Analysis Using the Versatile Gene-Based Association Study (VEGAS) 2 Tool

Nominally significant pathways are shown.

| Gene Ontology ID                                                                                           | N genes | p value  | q value | Genes                                                                |
|------------------------------------------------------------------------------------------------------------|---------|----------|---------|----------------------------------------------------------------------|
| GO:0004143 diacylglycerol kinase activity                                                                  | 2       | 6.37E-06 | 0.018   | DGKG,DGKB                                                            |
| PANTHER MOLECULAR FUNCTION Kinase                                                                          | 3       | 2.59E-05 | 0.024   | DGKG,DGKB,TPK1                                                       |
| GO:0007205 activation of protein kinase C activity by G-protein coupled receptor protein signaling pathway | 3       | 2.59E-05 | 0.024   | GAP43,DGKG,DGKB                                                      |
| REACTOME EFFECTS OF PIP2 HYDROLYSIS                                                                        | 5       | 2.24E-04 | 0.155   | PRKCE,MGLL,DGKG,DGKB,PRKCH                                           |
| GO:0019205 nucleobase nucleoside nucleotide kinase activity                                                | 3       | 3.28E-04 | 0.182   | SPEF2,ADK,DLG2                                                       |
| GO:0032147 activation of protein kinase activity                                                           | 6       | 5.38E-04 | 0.249   | GAP43,MAP3K13,DGKG,DGKB,EGFR,INSR                                    |
| REACTOME CRMP5 IN SEMA3A SIGNALING                                                                         | 3       | 2.38E-03 | 0.943   | PLXNA2,CRMP1,DPYSL2                                                  |
| REACTOME G ALPHA Q SIGNALLING EVENTS                                                                       | 9       | 4.42E-03 | 1       | GNG4,PRKCE,TACR1,KALRN,MGLL,DGKG,DGKB,PRKCH,PLCB4                    |
| Panther Axon guidance mediated by semaphorins                                                              | 4       | 6.05E-03 | 1       | PLXNA2,ARHGEF3,CRMP1,DPYSL2                                          |
| PANTHER BIOLOGICAL PROCESS Lipid metabolism                                                                | 10      | 7.79E-03 | 1       | PIK3CD,PLD5,DGKG,DGKB,SGMS1,PIK3C2G,ST8SIA1,PLCG2,PLCB4,SPTLC3       |
| GO:0045860 positive regulation of protein kinase activity                                                  | 11      | 0.013    | 1       | DAB1,GAP43,MAP3K13,DGKG,MAP3K5,DGKB,EGFR,RELN,FGD4,MAP3K9,INSR       |
| PANTHER BIOLOGICAL PROCESS Nucleoside, nucleotide and nucleic acid metabolism                              | 5       | 0.013    | 1       | ATP6V1G3,CRMP1,DDX4,DPYSL2,ADK                                       |
| GO:0005819 spindle                                                                                         | 5       | 0.019    | 1       | RCC2,CRMP1,NEDD9,MAD1L1,MAP2K5                                       |
| GO:0051347 positive regulation of transferase activity                                                     | 12      | 0.021    | 1       | DAB1,GAP43,MAP3K13,DGKG,MAP3K5,DGKB,EGFR,RELN,VAV2,FGD4,MAP3K9,INSR  |
| GO:0045859 regulation of protein kinase activity                                                           | 12      | 0.021    | 1       | DAB1,GAP43,MAP3K13,DGKG,MAP3K5,DGKB,EGFR,RELN,FGD4,MAP3K9,PRKCA,INSR |
| GO:0033674 positive regulation of kinase activity                                                          | 12      | 0.021    | 1       | DAB1,GAP43,MAP3K13,DGKG,MAP3K5,DGKB,EGFR,RELN,VAV2,FGD4,MAP3K9,INSR  |



|                                                           |    |       |   |                                                                                  |
|-----------------------------------------------------------|----|-------|---|----------------------------------------------------------------------------------|
| REACTOME GASTRIN CREB SIGNALLING PATHWAY VIA PKC AND MAPK | 12 | 0.021 | 1 | RPS6KA1,GNG4,PRKCE,TACR1,KALRN,MGLL,DGKG,DGKB,EGFR,PRKCH,PRKCA,PLCB4             |
| REACTOME PLATELET ACTIVATION SIGNALING AND AGGREGATION    | 14 | 0.022 | 1 | PLA2G4A,GNG4,AKT3,PRKCE,RAPGEF4,FN1,MGLL,DGKG,F13A1,DGKB,ABCC4,PRKCH,PLCG2,PRKCA |
| REACTOME SEMAPHORIN INTERACTIONS                          | 6  | 0.025 | 1 | PLXNA2,FARP2,CRMP1,SEMA5A,DPYSL2,SEMA6D                                          |
| GO:0031225 anchored to membrane                           | 13 | 0.028 | 1 | NEGR1,CNTN6,CNTN4,LSAMP,EFNA5,GOLGA7,DLG2,CNTN5,OPCML,CNTN1,GPC6,MDGA2,CDH13     |
| GO:0043549 regulation of kinase activity                  | 13 | 0.032 | 1 | DAB1,GAP43,MAP3K13,DGKG,MAP3K5,DGKB,EGFR,RELN,VAV2,FGD4,MAP3K9,PRKCA,INSR        |
| GO:0051338 regulation of transferase activity             | 13 | 0.032 | 1 | DAB1,GAP43,MAP3K13,DGKG,MAP3K5,DGKB,EGFR,RELN,VAV2,FGD4,MAP3K9,PRKCA,INSR        |

**eTable 11.** Association of the rs1266606 Variant With Sex-Stratified Phenotypic Traits in the UK Biobank  
Nominally significant associations are listed.

| Phenotype                                                                                           | Phenotype code            | beta    | se     | t statistic | p value | q value |
|-----------------------------------------------------------------------------------------------------|---------------------------|---------|--------|-------------|---------|---------|
| Enterocolitis due to Clostridium difficile                                                          | C DIFFICILE ENTEROCOLITIS | 0.0008  | 0.0002 | 3.5669      | 0.0004  | 0.5144  |
| Diagnoses - main ICD10: M54 Dorsalgia                                                               | M54                       | 0.0055  | 0.0016 | 3.4813      | 0.0005  | 0.5144  |
| Dorsalgia                                                                                           | M13 DORSALGIA             | 0.0055  | 0.0016 | 3.4813      | 0.0005  | 0.5144  |
| Maximum heart rate during fitness test                                                              | 6033 irnt                 | 0.0844  | 0.0252 | 3.3507      | 0.0008  | 0.5144  |
| Other and unspecified granulomatous disorders of skin and subcutaneous tissue                       | L12 GRANULOMASKINNAS      | 0.0008  | 0.0002 | 3.3437      | 0.0008  | 0.5144  |
| Treatment/medication code: zumenon 1mg tablet                                                       | 20003 1140928878          | 0.0008  | 0.0002 | 3.3082      | 0.0009  | 0.5144  |
| Low back pain                                                                                       | M13 LOWBACKPAIN           | 0.0040  | 0.0013 | 3.2373      | 0.0012  | 0.5665  |
| Fractured bone site(s): Leg                                                                         | 6151 2                    | 0.0023  | 0.0008 | 3.0191      | 0.0025  | 0.9833  |
| Destinations on discharge from hospital (recoded): Transfer within NHS provider: Surgical specialty | 41248 6004                | 0.0013  | 0.0005 | 2.9402      | 0.0033  | 0.9833  |
| Used an inhaler for chest within last hour                                                          | 3090                      | -0.0026 | 0.0009 | -2.9247     | 0.0034  | 0.9833  |
| Forced expiratory volume in 1-second (FEV1), predicted                                              | 20153 irnt                | -0.0285 | 0.0100 | -2.8472     | 0.0044  | 0.9833  |
| Radial styloid tenosynovitis [de Quervain]                                                          | M13 DEQUERVAIN            | 0.0009  | 0.0003 | 2.8369      | 0.0046  | 0.9833  |
| Diagnoses - main ICD10: O72 Postpartum haemorrhage                                                  | O72                       | 0.0011  | 0.0004 | 2.8357      | 0.0046  | 0.9833  |
| Vocal cord dysfunction                                                                              | VOCALCORDDYS              | 0.0008  | 0.0003 | 2.7906      | 0.0053  | 0.9833  |
| Job SOC coding: Scientific researchers                                                              | 22617 2321                | 0.0053  | 0.0019 | 2.7748      | 0.0055  | 0.9833  |
| 6mm weak meridian angle (left)                                                                      | 5102 irnt                 | 0.0625  | 0.0230 | 2.7196      | 0.0065  | 0.9833  |
| Workplace very dusty: Sometimes                                                                     | 22609 1                   | -0.0247 | 0.0091 | -2.7079     | 0.0068  | 0.9833  |
| Treatment/medication code: metoclopramide                                                           | 20003 1140879494          | 0.0010  | 0.0004 | 2.6890      | 0.0072  | 0.9833  |

|                                                                                                         |                            |         |        |         |        |        |
|---------------------------------------------------------------------------------------------------------|----------------------------|---------|--------|---------|--------|--------|
| Bacterial intestinal infections, IBD co-morbidities                                                     | IBD BACT INTEST INFECTIONS | 0.0013  | 0.0005 | 2.6850  | 0.0073 | 0.9833 |
| 6mm cylindrical power angle (left)                                                                      | 5113 irnt                  | 0.0616  | 0.0230 | 2.6802  | 0.0074 | 0.9833 |
| Treatment/medication code: qvar 50 inhaler                                                              | 20003 1141167594           | -0.0017 | 0.0007 | -2.6641 | 0.0077 | 0.9833 |
| Job coding: scientific researcher, scientific officer, medical research associate, experimental officer | 22601 23213026             | 0.0051  | 0.0019 | 2.6621  | 0.0078 | 0.9833 |
| Worried most days during period of worst anxiety                                                        | 20538                      | 0.0226  | 0.0087 | 2.6028  | 0.0093 | 0.9833 |
| Illnesses of adopted siblings: None of the above (group 1)                                              | 20114 100                  | -0.1580 | 0.0610 | -2.5888 | 0.0098 | 0.9833 |
| Diagnoses - main ICD10: R91 Abnormal findings on diagnostic imaging of lung                             | R91                        | -0.0013 | 0.0005 | -2.5790 | 0.0099 | 0.9833 |
| Breast disease (not cancer)                                                                             | 20002 1364                 | -0.0008 | 0.0003 | -2.5752 | 0.0100 | 0.9833 |
| Job coding: chef, cook, caterer                                                                         | 22601 54342896             | -0.0035 | 0.0013 | -2.5745 | 0.0100 | 0.9833 |
| Workplace very noisy: Often                                                                             | 22606 2                    | -0.0188 | 0.0073 | -2.5698 | 0.0102 | 0.9833 |
| Diagnoses - main ICD10: A04 Other bacterial intestinal infections                                       | A04                        | 0.0013  | 0.0005 | 2.5608  | 0.0104 | 0.9833 |
| Vitamin and mineral supplements: Vitamin D                                                              | 6155 4                     | 0.0055  | 0.0021 | 2.5557  | 0.0106 | 0.9833 |
| Diagnoses - main ICD10: H71 Cholesteatoma of middle ear                                                 | H71                        | 0.0007  | 0.0003 | 2.5457  | 0.0109 | 0.9833 |
| Viral hepatitis                                                                                         | AB1 VIRAL HEPATITIS        | 0.0006  | 0.0002 | 2.5447  | 0.0109 | 0.9833 |
| Pork intake                                                                                             | 1389                       | 0.0174  | 0.0069 | 2.5435  | 0.0110 | 0.9833 |
| Diagnoses - main ICD10: M17 Gonarthrosis [arthrosis of knee]                                            | M17                        | -0.0043 | 0.0017 | -2.5389 | 0.0111 | 0.9833 |
| Gonarthrosis [arthrosis of knee](FG)                                                                    | KNEE ARTHROSIS             | -0.0043 | 0.0017 | -2.5389 | 0.0111 | 0.9833 |
| Ulcerative colitis, NAS                                                                                 | ULCERNAS                   | 0.0017  | 0.0007 | 2.5242  | 0.0116 | 0.9833 |

|                                                                                                                                                         |                       |         |        |         |        |        |
|---------------------------------------------------------------------------------------------------------------------------------------------------------|-----------------------|---------|--------|---------|--------|--------|
| Diagnoses - main ICD10: L92 Granulomatous disorders of skin and subcutaneous tissue                                                                     | L92                   | 0.0008  | 0.0003 | 2.5090  | 0.0121 | 0.9833 |
| Granulomatous disorders of skin and subcutaneous tissue                                                                                                 | L12 GRANULOMATOUSSKIN | 0.0008  | 0.0003 | 2.5090  | 0.0121 | 0.9833 |
| Average monthly red wine intake                                                                                                                         | 4407                  | 0.0702  | 0.0281 | 2.4985  | 0.0125 | 0.9833 |
| Non-cancer illness code, self-reported: disc problem                                                                                                    | 20002 1532            | 0.0007  | 0.0003 | 2.4926  | 0.0127 | 0.9833 |
| Breathing problems improved/stopped away from workplace or on holiday: No                                                                               | 22618 0               | -0.0107 | 0.0043 | -2.4916 | 0.0127 | 0.9833 |
| Diagnoses - main ICD10: I47 Paroxysmal tachycardia                                                                                                      | I47                   | 0.0016  | 0.0007 | 2.4894  | 0.0128 | 0.9833 |
| 6mm regularity index (left)                                                                                                                             | 5162 irnt             | 0.0681  | 0.0275 | 2.4795  | 0.0132 | 0.9833 |
| Treatment/medication code: dihydrocodeine                                                                                                               | 20003 1140884464      | -0.0015 | 0.0006 | -2.4793 | 0.0132 | 0.9833 |
| Spherical power (left)                                                                                                                                  | 5085 irnt             | -0.0515 | 0.0210 | -2.4572 | 0.0140 | 0.9916 |
| Diagnoses - main ICD10: L73 Other follicular disorders                                                                                                  | L73                   | -0.0007 | 0.0003 | -2.4526 | 0.0142 | 0.9916 |
| Other follicular disorders                                                                                                                              | L12 FOLICULAROTH      | -0.0007 | 0.0003 | -2.4526 | 0.0142 | 0.9916 |
| Neutrophill percentage                                                                                                                                  | 30200 irnt            | 0.0239  | 0.0099 | 2.4142  | 0.0158 | 0.9916 |
| Job coding: senior official in central government including members of the senior civil service and the equivalent in the diplomatic service, mps, meps | 22601 11113200        | 0.0038  | 0.0016 | 2.4052  | 0.0162 | 0.9916 |
| Spherical power (right)                                                                                                                                 | 5084 irnt             | -0.0501 | 0.0209 | -2.4008 | 0.0164 | 0.9916 |
| Diagnoses - main ICD10: K05 Gingivitis and periodontal diseases                                                                                         | K05                   | 0.0009  | 0.0004 | 2.3993  | 0.0164 | 0.9916 |
| ECG, heart rate                                                                                                                                         | 5983 irnt             | 0.0611  | 0.0255 | 2.3978  | 0.0165 | 0.9916 |
| Treatment/medication code: glucophage 500mg tablet                                                                                                      | 20003 1140874686      | -0.0007 | 0.0003 | -2.3897 | 0.0169 | 0.9916 |

|                                                                                                                                             |                  |         |        |         |        |        |
|---------------------------------------------------------------------------------------------------------------------------------------------|------------------|---------|--------|---------|--------|--------|
| Pulse wave Arterial Stiffness index                                                                                                         | 21021 irnt       | -0.0410 | 0.0172 | -2.3777 | 0.0174 | 0.9916 |
| Job coding: librarian, assistant librarian                                                                                                  | 22601 24513314   | 0.0053  | 0.0022 | 2.3760  | 0.0175 | 0.9916 |
| Other/unspecified dorsalgia                                                                                                                 | M13 DORSALGIANAS | 0.0019  | 0.0008 | 2.3721  | 0.0177 | 0.9916 |
| Eye problems/disorders: Injury or trauma resulting in loss of vision                                                                        | 6148 3           | 0.0046  | 0.0019 | 2.3677  | 0.0179 | 0.9916 |
| Diagnoses - main ICD10: Z04 Examination and observation for other reasons                                                                   | Z04              | 0.0009  | 0.0004 | 2.3500  | 0.0188 | 0.9916 |
| Frequency of needing morning drink of alcohol after heavy drinking session in last year                                                     | 20412            | 0.0072  | 0.0031 | 2.3494  | 0.0188 | 0.9916 |
| Manic/hyper symptoms: I was more talkative than usual                                                                                       | 6156 12          | -0.0354 | 0.0152 | -2.3382 | 0.0194 | 0.9916 |
| Non-cancer illness code, self-reported: essential hypertension                                                                              | 20002 1072       | -0.0015 | 0.0007 | -2.3343 | 0.0196 | 0.9916 |
| Bell's palsy                                                                                                                                | G6 BELLPA        | -0.0007 | 0.0003 | -2.3335 | 0.0196 | 0.9916 |
| Target heart rate achieved                                                                                                                  | 6034             | 0.0201  | 0.0086 | 2.3333  | 0.0196 | 0.9916 |
| Job SOC coding: Senior officials in national government                                                                                     | 22617 1111       | 0.0036  | 0.0016 | 2.3266  | 0.0200 | 0.9916 |
| Job SOC coding: IT user support technicians                                                                                                 | 22617 3132       | -0.0035 | 0.0015 | -2.3259 | 0.0200 | 0.9916 |
| Lymphocyte percentage                                                                                                                       | 30180 irnt       | -0.0229 | 0.0099 | -2.3134 | 0.0207 | 0.9916 |
| Type of meals eaten: Bought sandwiches                                                                                                      | 20089 463        | -0.0163 | 0.0071 | -2.3097 | 0.0209 | 0.9916 |
| Job coding: it user support technician, help desk or helpline operator (computing), support technician (computing), systems support officer | 22601 31323061   | -0.0034 | 0.0015 | -2.3070 | 0.0211 | 0.9916 |
| Illnesses of siblings: Alzheimer's disease/dementia                                                                                         | 20111 10         | 0.0019  | 0.0008 | 2.2987  | 0.0215 | 0.9916 |
| Dried fruit intake                                                                                                                          | 1319             | -0.0183 | 0.0081 | -2.2753 | 0.0229 | 0.9916 |
| Treatment/medication code: epaderm ointment                                                                                                 | 20003 1140927730 | -0.0005 | 0.0002 | -2.2668 | 0.0234 | 0.9916 |

|                                                                                                          |                    |         |        |         |        |        |
|----------------------------------------------------------------------------------------------------------|--------------------|---------|--------|---------|--------|--------|
| Night shifts worked: This type of shift pattern was not worked during job                                | 22650 9            | 0.0177  | 0.0078 | 2.2665  | 0.0234 | 0.9916 |
| Female-specific factors                                                                                  | 2734               | -0.0162 | 0.0072 | -2.2643 | 0.0236 | 0.9916 |
| Non-cancer illness code, self-reported: throat or larynx disorder                                        | 20002 1414         | -0.0007 | 0.0003 | -2.2573 | 0.0240 | 0.9916 |
| Job SOC coding: Architects                                                                               | 22617 2431         | -0.0026 | 0.0011 | -2.2565 | 0.0240 | 0.9916 |
| Sodium in urine                                                                                          | 30530 irnt         | 0.0222  | 0.0099 | 2.2381  | 0.0252 | 0.9916 |
| Endocrine, nutritional and metabolic diseases                                                            | IV ENDOCRIN NUTRIT | -0.0031 | 0.0014 | -2.2355 | 0.0254 | 0.9916 |
| Pulse wave peak to peak time                                                                             | 4196 irnt          | 0.0381  | 0.0171 | 2.2285  | 0.0259 | 0.9916 |
| Ever had period of mania / excitability                                                                  | 20501              | 0.0071  | 0.0032 | 2.2276  | 0.0259 | 0.9916 |
| Diagnoses - main ICD10: C53 Malignant neoplasm of cervix uteri                                           | C53                | -0.0007 | 0.0003 | -2.2269 | 0.0260 | 0.9916 |
| Delivery methods: Low forceps, not breech                                                                | 41221 2            | 0.0189  | 0.0085 | 2.2260  | 0.0260 | 0.9916 |
| Job SOC coding: Psychologists                                                                            | 22617 2212         | -0.0029 | 0.0013 | -2.2220 | 0.0263 | 0.9916 |
| Age asthma diagnosed                                                                                     | 3786 irnt          | 0.0613  | 0.0277 | 2.2156  | 0.0267 | 0.9916 |
| Diagnoses - main ICD10: D70 Agranulocytosis                                                              | D70                | 0.0013  | 0.0006 | 2.2073  | 0.0273 | 0.9916 |
| Illnesses of adopted siblings: High blood pressure                                                       | 20114 8            | 0.1137  | 0.0516 | 2.2025  | 0.0279 | 0.9916 |
| Leg fat-free mass (right)                                                                                | 23113 irnt         | -0.0212 | 0.0097 | -2.1849 | 0.0289 | 0.9916 |
| Job coding: psychologist, psychometrist                                                                  | 22601 22123067     | -0.0028 | 0.0013 | -2.1815 | 0.0292 | 0.9916 |
| Treatment/medication code: ramipril                                                                      | 20003 1140860806   | 0.0037  | 0.0017 | 2.1801  | 0.0293 | 0.9916 |
| Leg predicted mass (right)                                                                               | 23114 irnt         | -0.0211 | 0.0097 | -2.1761 | 0.0296 | 0.9916 |
| Mental health problems ever diagnosed by a professional: Anxiety, nerves or generalized anxiety disorder | 20544 15           | 0.0138  | 0.0063 | 2.1754  | 0.0296 | 0.9916 |
| Neutrophil count                                                                                         | 30140 irnt         | 0.0214  | 0.0099 | 2.1571  | 0.0310 | 0.9916 |

|                                                                                    |                    |         |        |         |        |        |
|------------------------------------------------------------------------------------|--------------------|---------|--------|---------|--------|--------|
| Home area population density - urban or rural: Scotland - Accessible Small Town    | 20118 13           | -0.0012 | 0.0006 | -2.1552 | 0.0311 | 0.9916 |
| Illnesses of mother: Chronic bronchitis/emphysema                                  | 20110 6            | -0.0053 | 0.0025 | -2.1544 | 0.0312 | 0.9916 |
| Diagnoses - main ICD10: M89 Other disorders of bone                                | M89                | -0.0011 | 0.0005 | -2.1482 | 0.0317 | 0.9916 |
| Diagnoses - main ICD10: K20 Oesophagitis                                           | K20                | 0.0023  | 0.0011 | 2.1464  | 0.0318 | 0.9916 |
| Frequency of heavy DIY in last 4 weeks                                             | 2624               | 0.0432  | 0.0202 | 2.1401  | 0.0324 | 0.9916 |
| Fortified wine intake                                                              | 100720             | -0.0157 | 0.0073 | -2.1374 | 0.0326 | 0.9916 |
| Congenital malformations of heart and great arteries                               | CONGEN HEART ARTER | -0.0007 | 0.0003 | -2.1368 | 0.0326 | 0.9916 |
| Illnesses of adopted mother: None of the above (group 1)                           | 20113 100          | -0.1106 | 0.0517 | -2.1380 | 0.0327 | 0.9916 |
| Recent medication for COPD (Chronic Obstructive Pulmonary Disease)                 | 22170              | 0.1858  | 0.0868 | 2.1405  | 0.0328 | 0.9916 |
| Treatment/medication code: depo-provera 50mg/1ml injection                         | 20003 1141166200   | -0.0005 | 0.0002 | -2.1327 | 0.0329 | 0.9916 |
| Non-cancer illness code, self-reported: hypothyroidism/myxoedema                   | 20002 1226         | -0.0055 | 0.0026 | -2.1235 | 0.0337 | 0.9916 |
| Leg fat-free mass (left)                                                           | 23117 irnt         | -0.0206 | 0.0097 | -2.1189 | 0.0341 | 0.9916 |
| Illnesses of adopted siblings: Heart disease                                       | 20114 1            | 0.0820  | 0.0387 | 2.1171  | 0.0345 | 0.9916 |
| Leg predicted mass (left)                                                          | 23118 irnt         | -0.0205 | 0.0097 | -2.1051 | 0.0353 | 0.9916 |
| Diagnoses - main ICD10: Z51 Other medical care                                     | Z51                | -0.0005 | 0.0003 | -2.1030 | 0.0355 | 0.9916 |
| Average monthly champagne plus white wine intake                                   | 4418               | 0.0627  | 0.0299 | 2.0997  | 0.0358 | 0.9916 |
| Actions taken following self-harm: Receive help from friends / family / neighbours | 20554 6            | 0.0044  | 0.0021 | 2.0963  | 0.0361 | 0.9916 |
| Diagnoses - main ICD10: M21 Other acquired deformities of limbs                    | M21                | -0.0009 | 0.0004 | -2.0939 | 0.0363 | 0.9916 |

|                                                                                              |                     |         |        |         |        |        |
|----------------------------------------------------------------------------------------------|---------------------|---------|--------|---------|--------|--------|
| Ever self-harmed                                                                             | 20480               | 0.0080  | 0.0038 | 2.0938  | 0.0363 | 0.9916 |
| Illnesses of siblings: Chronic bronchitis/emphysema                                          | 20111 6             | 0.0040  | 0.0019 | 2.0931  | 0.0363 | 0.9916 |
| Diagnoses - main ICD10: K62 Other diseases of anus and rectum                                | K62                 | -0.0039 | 0.0019 | -2.0928 | 0.0364 | 0.9916 |
| COPD, early/late onset                                                                       | COPD EARLYANDLATER  | 0.0014  | 0.0007 | 2.0913  | 0.0365 | 0.9916 |
| Whole body fat-free mass                                                                     | 23101 irnt          | -0.0203 | 0.0097 | -2.0893 | 0.0367 | 0.9916 |
| Diagnoses - main ICD10: R18 Ascites                                                          | R18                 | 0.0007  | 0.0003 | 2.0884  | 0.0368 | 0.9916 |
| Never eat eggs, dairy, wheat, sugar: Dairy products                                          | 6144 2              | -0.0031 | 0.0015 | -2.0875 | 0.0368 | 0.9916 |
| Current employment status: In paid employment or self-employed                               | 6142 1              | -0.0082 | 0.0039 | -2.0848 | 0.0371 | 0.9916 |
| Number of triplets attempted (left)                                                          | 4269                | 0.0089  | 0.0043 | 2.0828  | 0.0373 | 0.9916 |
| Hidradenitis suppurativa                                                                     | L12 HIDRADENITISSUP | -0.0005 | 0.0002 | -2.0780 | 0.0377 | 0.9916 |
| Treatment/medication code: airomir 100micrograms cfc-free inhaler                            | 20003 1140917034    | -0.0005 | 0.0002 | -2.0777 | 0.0377 | 0.9916 |
| Diagnoses - main ICD10: Z48 Other surgical follow-up care                                    | Z48                 | 0.0010  | 0.0005 | 2.0714  | 0.0383 | 0.9916 |
| Nitrogen dioxide air pollution; 2007                                                         | 24018 irnt          | 0.0203  | 0.0098 | 2.0709  | 0.0384 | 0.9916 |
| Diagnoses - main ICD10: N12 Tubulo-interstitial nephritis, not specified as acute or chronic | N12                 | 0.0010  | 0.0005 | 2.0684  | 0.0386 | 0.9916 |
| Manic/hyper symptoms: I was more active than usual                                           | 6156 11             | 0.0335  | 0.0163 | 2.0625  | 0.0392 | 0.9916 |
| Frequency of inability to stop worrying during worst period of anxiety                       | 20539               | 0.0412  | 0.0200 | 2.0595  | 0.0395 | 0.9916 |
| Manic/hyper symptoms: None of the above                                                      | 6156 100            | 0.0384  | 0.0187 | 2.0557  | 0.0398 | 0.9916 |
| Diagnoses - main ICD10: Q21 Congenital malformations of cardiac septa                        | Q21                 | -0.0006 | 0.0003 | -2.0486 | 0.0405 | 0.9916 |
| Part of a multiple birth                                                                     | 1777                | -0.0030 | 0.0015 | -2.0483 | 0.0405 | 0.9916 |



|                                                                                                                  |                  |         |        |         |        |        |
|------------------------------------------------------------------------------------------------------------------|------------------|---------|--------|---------|--------|--------|
| Activities undertaken to treat depression: Other therapeutic activities such as mindfulness, yoga or art classes | 20547 3          | -0.0107 | 0.0052 | -2.0390 | 0.0415 | 0.9916 |
| Whole body water mass                                                                                            | 23102 irnt       | -0.0198 | 0.0097 | -2.0318 | 0.0422 | 0.9916 |
| Diagnoses - main ICD10: C44 Other malignant neoplasms of skin                                                    | C44              | -0.0030 | 0.0015 | -2.0290 | 0.0425 | 0.9916 |
| Treatment/medication code: mirena 20mcg/24hrs intrauterine system                                                | 20003 1140921822 | -0.0011 | 0.0005 | -2.0251 | 0.0429 | 0.9916 |
| Diagnoses - main ICD10: J98 Other respiratory disorders                                                          | J98              | 0.0008  | 0.0004 | 2.0246  | 0.0429 | 0.9916 |
| Behavioural and miscellaneous addictions: A behaviour                                                            | 20552 2          | 0.0026  | 0.0013 | 2.0198  | 0.0434 | 0.9916 |
| Diagnoses - main ICD10: O47 False labour                                                                         | O47              | -0.0013 | 0.0006 | -2.0183 | 0.0436 | 0.9916 |
| Trunk predicted mass                                                                                             | 23130 irnt       | -0.0196 | 0.0097 | -2.0165 | 0.0437 | 0.9916 |
| Diagnoses - main ICD10: J44 Other chronic obstructive pulmonary disease                                          | J44              | 0.0013  | 0.0006 | 2.0087  | 0.0446 | 0.9916 |
| Trunk fat-free mass                                                                                              | 23129 irnt       | -0.0195 | 0.0097 | -2.0058 | 0.0449 | 0.9916 |
| Treatment/medication code: allopurinol                                                                           | 20003 1140875408 | 0.0008  | 0.0004 | 2.0041  | 0.0451 | 0.9916 |
| Non-cancer illness code, self-reported: spinal injury                                                            | 20002 1267       | 0.0007  | 0.0003 | 1.9959  | 0.0459 | 0.9916 |
| 3mm asymmetry index (left)                                                                                       | 5156 irnt        | 0.0436  | 0.0218 | 1.9959  | 0.0460 | 0.9916 |
| Cereal type: Biscuit cereal (e.g. Weetabix)                                                                      | 1468 2           | 0.0079  | 0.0040 | 1.9922  | 0.0464 | 0.9916 |
| Nitrogen dioxide air pollution; 2006                                                                             | 24017 irnt       | 0.0195  | 0.0098 | 1.9912  | 0.0465 | 0.9916 |
| Particulate matter air pollution (pm10); 2007                                                                    | 24019 irnt       | 0.0188  | 0.0094 | 1.9906  | 0.0465 | 0.9916 |
| Non-cancer illness code, self-reported: clotting disorder/excessive bleeding                                     | 20002 1445       | -0.0007 | 0.0003 | -1.9903 | 0.0466 | 0.9916 |
| Treatment/medication code: sotalol                                                                               | 20003 1140879854 | 0.0007  | 0.0003 | 1.9897  | 0.0466 | 0.9916 |

|                                                                                                                      |                    |         |        |         |        |        |
|----------------------------------------------------------------------------------------------------------------------|--------------------|---------|--------|---------|--------|--------|
| Other specified/unspecified disorders of synovium and tendon +Other specified/unspecified bursopathies               | M13 DISSYNOTENDNAS | 0.0006  | 0.0003 | 1.9896  | 0.0466 | 0.9916 |
| Job coding: personnel or industrial relations officer, recruitment consultant                                        | 22601 35623213     | 0.0029  | 0.0015 | 1.9883  | 0.0468 | 0.9916 |
| Diagnoses - main ICD10: M80 Osteoporosis with pathological fracture                                                  | M80                | 0.0005  | 0.0003 | 1.9877  | 0.0468 | 0.9916 |
| Treatment/medication code: food supplement/plant/herbal extract                                                      | 20003 1199         | -0.0014 | 0.0007 | -1.9867 | 0.0470 | 0.9916 |
| Treatment/medication code: meloxicam                                                                                 | 20003 1140926732   | -0.0012 | 0.0006 | -1.9853 | 0.0471 | 0.9916 |
| Reason for reducing amount of alcohol drunk: Doctor's advice                                                         | 2664 2             | 0.0032  | 0.0016 | 1.9829  | 0.0474 | 0.9916 |
| Actions taken following self-harm: See anyone from psychiatric or mental health services, including liaison services | 20554 1            | 0.0044  | 0.0022 | 1.9774  | 0.0480 | 0.9916 |
| Basal metabolic rate                                                                                                 | 23105 irnt         | -0.0193 | 0.0097 | -1.9769 | 0.0481 | 0.9916 |
| Non-cancer illness code, self-reported: unclassifiable                                                               | 20002 99999        | 0.0039  | 0.0020 | 1.9720  | 0.0486 | 0.9916 |
| Arm predicted mass (left)                                                                                            | 23126 irnt         | -0.0195 | 0.0099 | -1.9719 | 0.0486 | 0.9916 |
| Gap coding: Unable to work due to sickness or disability                                                             | 22660 106          | -0.0075 | 0.0038 | -1.9705 | 0.0488 | 0.9916 |
| Job coding: library assistant/clerk, press cuttings clerk                                                            | 22601 41353316     | -0.0041 | 0.0021 | -1.9704 | 0.0488 | 0.9916 |
| Type milk consumed: did not have milk                                                                                | 100920 0           | 0.0117  | 0.0059 | 1.9651  | 0.0494 | 0.9916 |
| 6mm asymmetry angle (right)                                                                                          | 5109 irnt          | -0.0548 | 0.0279 | -1.9635 | 0.0496 | 0.9916 |

**eTable 12.** Association of the rs1266606 Variant With Phenotypic Traits Available From the GWAS Atlas

| Atlas ID | PMID                                                                                    | Year | Domain       | Trait                                                     | P-value  | N      | EA | NEA |
|----------|-----------------------------------------------------------------------------------------|------|--------------|-----------------------------------------------------------|----------|--------|----|-----|
| 3271     | 31427789                                                                                | 2019 | Skeletal     | Comparative height size at age 10                         | 0.000396 | 380167 | G  | A   |
| 3187     | 31427789                                                                                | 2019 | Skeletal     | Standing height                                           | 0.000709 | 385748 | G  | A   |
| 657      | 24816252                                                                                | 2014 | Metabolic    | :::X-03094                                                | 0.00079  | 7804   | A  | G   |
| 600      | 24816252                                                                                | 2014 | Metabolic    | Peptide::Fibrinogen cleavage peptide::DSGEGDFXAEGGGV R*   | 0.00137  | 5371   | A  | G   |
| 674      | 24816252                                                                                | 2014 | Metabolic    | :::X-08402                                                | 0.001833 | 7726   | A  | G   |
| 4660     | BioRxiv:<br><a href="https://doi.org/10.1101/288568">https://doi.org/10.1101/288568</a> | 2019 | Neurological | Posterior limb of internal capsule fractional anisotropy  | 0.001911 | 17706  | G  | A   |
| 4746     | BioRxiv:<br><a href="https://doi.org/10.1101/288654">https://doi.org/10.1101/288654</a> | 2019 | Neurological | Inferior fronto-occipital fasciculus radial diffusivities | 0.002372 | 17706  | A  | G   |
| 138      | 23754948                                                                                | 2013 | Metabolic    | Waist-hip ratio (male)                                    | 0.0039   | 34629  | A  | G   |
| 4198     | 31217584                                                                                | 2019 | Metabolic    | Waist-hip ratio (male)                                    | 0.004188 | 24838  | G  | A   |
| 3362     | 31427789                                                                                | 2019 | Mortality    | Mother's age at death                                     | 0.004318 | 227076 | G  | A   |
| 3250     | 31427789                                                                                | 2019 | Nutritional  | Pork intake                                               | 0.004653 | 384328 | A  | G   |
| 599      | 24816252                                                                                | 2014 | Metabolic    | Peptide::Fibrinogen cleavage peptide::ADSGEGDFXAEGGG VR*  | 0.004728 | 5588   | A  | G   |
| 472      | 24816252                                                                                | 2014 | Metabolic    | Lipid::Bile acid metabolism::taurodeoxycholate            | 0.004803 | 1564   | G  | A   |

|      |                                                                                         |      |                |                                                                |          |        |   |   |
|------|-----------------------------------------------------------------------------------------|------|----------------|----------------------------------------------------------------|----------|--------|---|---|
| 4748 | BioRxiv:<br><a href="https://doi.org/10.1101/288656">https://doi.org/10.1101/288656</a> | 2019 | Neurological   | Posterior limb of internal capsule radial diffusivities        | 0.005027 | 17706  | A | G |
| 4664 | BioRxiv:<br><a href="https://doi.org/10.1101/288572">https://doi.org/10.1101/288572</a> | 2019 | Neurological   | Superior corona radiata fractional anisotropy                  | 0.005161 | 17706  | G | A |
| 4268 | 29892015                                                                                | 2018 | Cardiovascular | Atrial Fibrillation                                            | 0.005501 | 588190 | G | A |
| 181  | 25673412                                                                                | 2015 | Metabolic      | Waist-hip ratio (male)                                         | 0.0065   | 94434  | A | G |
| 182  | 25673412                                                                                | 2015 | Metabolic      | Waist-hip ratio (male)                                         | 0.0065   | 100032 | A | G |
| 4659 | BioRxiv:<br><a href="https://doi.org/10.1101/288567">https://doi.org/10.1101/288567</a> | 2019 | Neurological   | Posterior corona radiata fractional anisotropy                 | 0.006718 | 17706  | G | A |
| 791  | 24816252                                                                                | 2014 | Metabolic      | :::X-12704                                                     | 0.007125 | 1813   | A | G |
| 132  | 23754948                                                                                | 2013 | Metabolic      | Waist circumference (male)                                     | 0.0074   | 36231  | A | G |
| 187  | 25673412                                                                                | 2015 | Metabolic      | Waist-hip ratio (male, adjusted for BMI)                       | 0.0074   | 93480  | A | G |
| 188  | 25673412                                                                                | 2015 | Metabolic      | Waist-hip ratio (male, adjusted for BMI)                       | 0.0074   | 99078  | A | G |
| 3874 | 27863252                                                                                | 2016 | Immunological  | Eosinophil count (three-way meta)                              | 0.007416 | 172275 | G | A |
| 4662 | BioRxiv:<br><a href="https://doi.org/10.1101/288570">https://doi.org/10.1101/288570</a> | 2019 | Neurological   | Retrolenticular part of internal capsule fractional anisotropy | 0.007967 | 17706  | G | A |
| 3939 | 28892062                                                                                | 2017 | Metabolic      | Body Mass Index                                                | 0.008162 | 158284 | A | G |
| 1011 | 27989323                                                                                | 2017 | Immunological  | Tumor necrosis factor beta                                     | 0.008825 | 1559   | A | G |
| 4355 | 30206230                                                                                | 2018 | Immunological  | IL-1beta in gingival crevicular                                | 0.009077 | 4910   | G | A |

|      |                                                                                         |      |                  |                                                               |          |        |   |   |
|------|-----------------------------------------------------------------------------------------|------|------------------|---------------------------------------------------------------|----------|--------|---|---|
| 948  | 27005778                                                                                | 2016 | Metabolic        | Total fatty acids                                             | 0.009187 | 13505  | A | G |
| 4740 | BioRxiv:<br><a href="https://doi.org/10.1101/288648">https://doi.org/10.1101/288648</a> | 2019 | Neurological     | Cingulum (hippocampus) radial diffusivities                   | 0.009559 | 17706  | A | G |
| 4658 | BioRxiv:<br><a href="https://doi.org/10.1101/288566">https://doi.org/10.1101/288566</a> | 2019 | Neurological     | Inferior fronto-occipital fasciculus fractional anisotropy    | 0.009567 | 17706  | G | A |
| 747  | 24816252                                                                                | 2014 | Metabolic        | :::X-12029                                                    | 0.01031  | 7564   | G | A |
| 675  | 24816252                                                                                | 2014 | Metabolic        | :::X-08766                                                    | 0.01049  | 6050   | A | G |
| 4122 | 29403010                                                                                | 2018 | Metabolic        | Gamma-glutamyl transferase                                    | 0.01083  | 118309 | G | A |
| 4702 | BioRxiv:<br><a href="https://doi.org/10.1101/288610">https://doi.org/10.1101/288610</a> | 2019 | Neurological     | Inferior fronto-occipital fasciculus mean diffusivities       | 0.01134  | 17706  | A | G |
| 205  | 21355061                                                                                | 2011 | Metabolic        | Microalbuminuria                                              | 0.012    | 30482  | G | A |
| 3252 | 31427789                                                                                | 2019 | Nutritional      | Bread intake                                                  | 0.01265  | 377627 | G | A |
| 949  | 27005778                                                                                | 2016 | Metabolic        | Total phosphoglycerides                                       | 0.012957 | 13519  | A | G |
| 3674 | 31427789                                                                                | 2019 | Gastrointestinal | Diagnoses - main ICD10: K62 Other diseases of anus and rectum | 0.01328  | 300791 | G | A |
| 869  | 27005778                                                                                | 2016 | Metabolic        | Omega7 and L9 and saturated fatty acids                       | 0.013501 | 13506  | A | G |
| 3929 | 28749367                                                                                | 2017 | Cardiovascular   | QT interval                                                   | 0.01402  | 22158  | G | A |
| 369  | 24816252                                                                                | 2014 | Metabolic        | Amino acid::Creatine metabolism::creatine                     | 0.01409  | 7822   | A | G |
| 930  | 27005778                                                                                | 2016 | Metabolic        | Phosphatidylcholine and other cholines                        | 0.0143   | 13542  | A | G |
| 3254 | 31427789                                                                                | 2019 | Nutritional      | Salt added to food                                            | 0.01475  | 386322 | A | G |

|      |                                                                                         |      |                     |                                                                                                             |         |        |   |   |
|------|-----------------------------------------------------------------------------------------|------|---------------------|-------------------------------------------------------------------------------------------------------------|---------|--------|---|---|
| 848  | 24816252                                                                                | 2014 | Metabolic           | Xenobiotics::Food component/Plant::X-14977--vanillin                                                        | 0.01499 | 1789   | A | G |
| 4649 | BioRxiv:<br><a href="https://doi.org/10.1101/288557">https://doi.org/10.1101/288557</a> | 2019 | Neurological        | Average across all tracts fractional anisotropy                                                             | 0.01616 | 17706  | G | A |
| 4098 | 29403010                                                                                | 2018 | Metabolic           | Total cholesterol                                                                                           | 0.01718 | 128305 | G | A |
| 572  | 24816252                                                                                | 2014 | Metabolic           | Lipid::Sterol, Steroid::androsterone sulfate                                                                | 0.01756 | 7785   | G | A |
| 4750 | BioRxiv:<br><a href="https://doi.org/10.1101/288658">https://doi.org/10.1101/288658</a> | 2019 | Neurological        | Retrolenticular part of internal capsule radial diffusivities                                               | 0.01766 | 17706  | A | G |
| 569  | 24816252                                                                                | 2014 | Metabolic           | Lipid::Sterol, Steroid::4-androsten-3beta,17beta-diol disulfate 2*                                          | 0.01782 | 7776   | G | A |
| 3555 | 31427789                                                                                | 2019 | Activities          | Medication for cholesterol, blood pressure, diabetes, or take exogenous hormones: Blood pressure medication | 0.01863 | 207533 | A | G |
| 3407 | 31427789                                                                                | 2019 | Social Interactions | Number of older siblings                                                                                    | 0.01892 | 111284 | A | G |
| 3665 | 31427789                                                                                | 2019 | Neoplasms           | Diagnoses - main ICD10: C44 Other and unspecified malignant neoplasm of skin                                | 0.01973 | 300791 | G | A |
| 4667 | BioRxiv:<br><a href="https://doi.org/10.1101/288575">https://doi.org/10.1101/288575</a> | 2019 | Neurological        | Sagittal stratum fractional anisotropy                                                                      | 0.01993 | 17706  | G | A |

|      |                                                                                         |      |               |                                                                 |         |        |   |   |
|------|-----------------------------------------------------------------------------------------|------|---------------|-----------------------------------------------------------------|---------|--------|---|---|
| 577  | 24816252                                                                                | 2014 | Metabolic     | Lipid::Sterol,<br>Steroid::epiandrosterone<br>sulfate           | 0.02001 | 7769   | G | A |
| 3873 | 27863252                                                                                | 2016 | Immunological | Sum eosinophil basophil<br>count (three-way meta)               | 0.02029 | 171771 | G | A |
| 3641 | 31427789                                                                                | 2019 | Environment   | Illnesses of mother: Bowel<br>cancer                            | 0.02043 | 367939 | A | G |
| 598  | 24816252                                                                                | 2014 | Metabolic     | Peptide::Fibrinogen cleavage<br>peptide::ADpSGEGDFXAEGG<br>GVR* | 0.02049 | 3939   | A | G |
| 4654 | BioRxiv:<br><a href="https://doi.org/10.1101/288562">https://doi.org/10.1101/288562</a> | 2019 | Neurological  | External capsule fractional<br>anisotropy                       | 0.02164 | 17706  | G | A |
| 185  | 25673412                                                                                | 2015 | Metabolic     | Waist-hip ratio (adjusted for<br>BMI)                           | 0.022   | 210086 | A | G |
| 186  | 25673412                                                                                | 2015 | Metabolic     | Waist-hip ratio (adjusted for<br>BMI)                           | 0.022   | 224456 | A | G |
| 4256 | 30952852                                                                                | 2019 | Psychiatric   | Sleep midpoint                                                  | 0.022   | 84810  | A | G |
| 4373 | 30367059                                                                                | 2018 | Endocrine     | Free thyroxine (FT4, male)                                      | 0.02255 | 22455  | A | G |
| 3296 | 31427789                                                                                | 2019 | Psychiatric   | Risk taking                                                     | 0.02301 | 372651 | A | G |
| 3941 | 28892062                                                                                | 2017 | Metabolic     | Body Mass Index (female)                                        | 0.02305 | 72390  | A | G |
| 4652 | BioRxiv:<br><a href="https://doi.org/10.1101/288560">https://doi.org/10.1101/288560</a> | 2019 | Neurological  | Cingulum (hippocampus)<br>fractional anisotropy                 | 0.02305 | 17706  | G | A |
| 4755 | BioRxiv:<br><a href="https://doi.org/10.1101/288663">https://doi.org/10.1101/288663</a> | 2019 | Neurological  | Sagittal stratum radial<br>dusivities                           | 0.02337 | 17706  | A | G |

|      |                                                                                         |      |                   |                                                                         |          |        |   |   |
|------|-----------------------------------------------------------------------------------------|------|-------------------|-------------------------------------------------------------------------|----------|--------|---|---|
| 3660 | 31427789                                                                                | 2019 | Neoplasms         | Cancer register - Histology of cancer tumour: Basal cell carcinoma, NOS | 0.02383  | 60692  | G | A |
| 3838 | 27863252                                                                                | 2016 | Immunological     | Eosinophil count (two-way meta)                                         | 0.023842 | 131999 | G | A |
| 3383 | 31427789                                                                                | 2019 | Cognitive         | Prospective memory test - Number of attempts                            | 0.02404  | 128912 | A | G |
| 3691 | 31427789                                                                                | 2019 | Cardiovascular    | Diagnoses - secondary ICD10: I10 Essential (primary) hypertension       | 0.02433  | 244890 | A | G |
| 4696 | BioRxiv:<br><a href="https://doi.org/10.1101/288604">https://doi.org/10.1101/288604</a> | 2019 | Neurological      | Cingulum (hippocampus) mean diuivities                                  | 0.02464  | 17706  | A | G |
| 3698 | 31427789                                                                                | 2019 | Gastrointestinal  | Diagnoses - secondary ICD10: K44 Diaphragmatic hernia                   | 0.025    | 244890 | A | G |
| 378  | 24816252                                                                                | 2014 | Metabolic         | Amino acid::Glutathione metabolism::cysteine-glutathione disulfide      | 0.02517  | 1997   | G | A |
| 3595 | 31427789                                                                                | 2019 | Activities        | Mineral and other dietary supplements: Zinc                             | 0.02576  | 385261 | G | A |
| 868  | 27005778                                                                                | 2016 | Metabolic         | OmegaL6 fatty acids                                                     | 0.026077 | 13506  | A | G |
| 4726 | BioRxiv:<br><a href="https://doi.org/10.1101/288634">https://doi.org/10.1101/288634</a> | 2019 | Neurological      | Posterior limb of internal capsule mode of anisotropy                   | 0.02661  | 17706  | G | A |
| 3401 | 31427789                                                                                | 2019 | Ear, Nose, Throat | Loud music exposure frequency                                           | 0.02673  | 127474 | A | G |
| 4538 | 31676860                                                                                | 2019 | Neurological      | Right hippocampus                                                       | 0.02715  | 19629  | G | A |
| 739  | 24816252                                                                                | 2014 | Metabolic         | :::X-11850                                                              | 0.02809  | 4868   | G | A |
| 4155 | 29403010                                                                                | 2018 | Cardiovascular    | E/A ratio                                                               | 0.02836  | 8600   | G | A |



|      |                                                                                         |      |              |                                                                                                      |          |        |   |   |
|------|-----------------------------------------------------------------------------------------|------|--------------|------------------------------------------------------------------------------------------------------|----------|--------|---|---|
| 528  | 24816252                                                                                | 2014 | Metabolic    | Lipid::Long chain fatty acid::stearate (18:0)                                                        | 0.02864  | 7803   | G | A |
| 3270 | 31427789                                                                                | 2019 | Metabolic    | Comparative body size at age 10                                                                      | 0.02981  | 379749 | G | A |
| 179  | 25673412                                                                                | 2015 | Metabolic    | Waist-hip ratio                                                                                      | 0.03     | 212248 | A | G |
| 180  | 25673412                                                                                | 2015 | Metabolic    | Waist-hip ratio                                                                                      | 0.03     | 226643 | A | G |
| 4675 | BioRxiv:<br><a href="https://doi.org/10.1101/288583">https://doi.org/10.1101/288583</a> | 2019 | Neurological | Corticospinal tract axial diffusivities                                                              | 0.03028  | 17706  | A | G |
| 767  | 24816252                                                                                | 2014 | Metabolic    | :::X-12236                                                                                           | 0.03105  | 1924   | A | G |
| 3968 | 29273806                                                                                | 2018 | Respiratory  | Asthma (fixed effect model)                                                                          | 0.031824 | 127669 | G | A |
| 462  | 24816252                                                                                | 2014 | Metabolic    | Energy::Oxidative phosphorylation::acetylphosphate                                                   | 0.03281  | 7789   | A | G |
| 4043 | 30124842                                                                                | 2018 | Skeletal     | Height                                                                                               | 0.033    | 693529 | G | A |
| 4525 | 31676860                                                                                | 2019 | Neurological | Left hippocampus                                                                                     | 0.03358  | 19629  | G | A |
| 724  | 24816252                                                                                | 2014 | Metabolic    | :::X-11552                                                                                           | 0.0342   | 2170   | G | A |
| 648  | 24816252                                                                                | 2014 | Metabolic    | Xenobiotics::Xanthine metabolism::theobromine                                                        | 0.03432  | 7768   | G | A |
| 3589 | 31427789                                                                                | 2019 | Activities   | Types of physical activity in last 4 weeks: Heavy DIY (eg: weeding, lawn mowing, carpentry, digging) | 0.0345   | 384450 | G | A |
| 742  | 24816252                                                                                | 2014 | Metabolic    | :::X-11859                                                                                           | 0.03456  | 2721   | A | G |
| 814  | 24816252                                                                                | 2014 | Metabolic    | :::X-13069                                                                                           | 0.03484  | 6770   | G | A |
| 4259 | 30946739                                                                                | 2019 | Activities   | Facial attractiveness (female-coder, male samples)                                                   | 0.03541  | 1792   | G | A |
| 23   | 26176920                                                                                | 2015 | Psychiatric  | Major depressive disorder (females)                                                                  | 0.03544  | 10640  | A | G |

|      |          |      |                |                                                                                                                                                       |         |        |    |    |
|------|----------|------|----------------|-------------------------------------------------------------------------------------------------------------------------------------------------------|---------|--------|----|----|
| 1117 | 27918534 | 2017 | Metabolic      | Pericardial adipose tissue volume                                                                                                                     | 0.036   | 12204  | NA | NA |
| 3292 | 31427789 | 2019 | Psychiatric    | Worry too long after embarrassment                                                                                                                    | 0.03634 | 370660 | G  | A  |
| 3598 | 31427789 | 2019 | Cardiovascular | Non-cancer illness code, self-reported: angina                                                                                                        | 0.03706 | 289307 | A  | G  |
| 4318 | 30649302 | 2019 | Reproduction   | Anti-Mullerian hormone                                                                                                                                | 0.0375  | 3344   | G  | A  |
| 4509 | 31676860 | 2019 | Neurological   | Cerebellar vermal lobules VIII X                                                                                                                      | 0.03758 | 19629  | G  | A  |
| 4375 | 30367059 | 2018 | Endocrine      | Hyperthyroidism                                                                                                                                       | 0.03771 | 51823  | A  | G  |
| 66   | 27416945 | 2016 | Endocrine      | Insulin sensitivity index (combined influence of the genotype effect adjusted for BMI and the interaction effect between the genotype and BMI on ISI) | 0.03775 | 16753  | A  | G  |
| 3419 | 31427789 | 2019 | Cognitive      | Pairs matching test - Number of correct matches in round                                                                                              | 0.03777 | 95708  | G  | A  |
| 3999 | 29500382 | 2018 | Psychiatric    | Worry too long after embarrassment (WORR-EMB)                                                                                                         | 0.03824 | 261094 | G  | A  |
| 606  | 24816252 | 2014 | Metabolic      | Peptide::gamma-glutamyl::gamma-glutamylphenylalanine                                                                                                  | 0.03841 | 7753   | G  | A  |
| 619  | 24816252 | 2014 | Metabolic      | Xenobiotics::Chemical::glycerol 2-phosphate                                                                                                           | 0.0388  | 5912   | G  | A  |
| 3875 | 27863252 | 2016 | Immunological  | Eosinophil percentage of white cells (three-way meta)                                                                                                 | 0.03964 | 172378 | G  | A  |
| 665  | 24816252 | 2014 | Metabolic      | :::X-05907                                                                                                                                            | 0.04014 | 7734   | A  | G  |
| 3263 | 31427789 | 2019 | Psychiatric    | Average weekly champagne plus white wine intake                                                                                                       | 0.04106 | 273869 | A  | G  |
| 4156 | 30531953 | 2018 | Neurological   | Epilepsy                                                                                                                                              | 0.04133 | 44889  | G  | A  |

|      |                                                                                         |      |                  |                                                     |          |        |   |   |
|------|-----------------------------------------------------------------------------------------|------|------------------|-----------------------------------------------------|----------|--------|---|---|
| 4737 | BioRxiv:<br><a href="https://doi.org/10.1101/288645">https://doi.org/10.1101/288645</a> | 2019 | Neurological     | Average across all tracts radial diffusivities      | 0.04336  | 17706  | A | G |
| 3486 | 31427789                                                                                | 2019 | Nutritional      | Bread type: Brown                                   | 0.04338  | 372617 | A | G |
| 4711 | BioRxiv:<br><a href="https://doi.org/10.1101/288619">https://doi.org/10.1101/288619</a> | 2019 | Neurological     | Sagittal stratum mean diffusivities                 | 0.04342  | 17706  | A | G |
| 4742 | BioRxiv:<br><a href="https://doi.org/10.1101/288650">https://doi.org/10.1101/288650</a> | 2019 | Neurological     | External capsule radial diffusivities               | 0.04356  | 17706  | A | G |
| 4338 | 30531941                                                                                | 2018 | Psychiatric      | Sleep duration (conditioning sex and BMI)           | 0.044    | 91105  | G | A |
| 4639 | 31676860                                                                                | 2019 | Neurological     | Right hippocampus                                   | 0.04406  | 21821  | G | A |
| 3437 | 31427789                                                                                | 2019 | Respiratory      | Doctor diagnosed hayfever or allergic rhinitis      | 0.04492  | 97640  | G | A |
| 25   | 24839885                                                                                | 2014 | Psychiatric      | Internalizing                                       | 0.0452   | 4596   | G | A |
| 697  | 24816252                                                                                | 2014 | Metabolic        | XXX-11381                                           | 0.04552  | 7753   | A | G |
| 928  | 27005778                                                                                | 2016 | Metabolic        | Monounsaturated fatty acids                         | 0.045637 | 13535  | A | G |
| 3916 | 28073927                                                                                | 2017 | Ophthalmological | Disc area                                           | 0.04684  | 7307   | G | A |
| 3839 | 27863252                                                                                | 2016 | Immunological    | Eosinophil percentage of white cells (two-way meta) | 0.047265 | 132052 | G | A |
| 3969 | 29273806                                                                                | 2018 | Respiratory      | Asthma (random effect model)                        | 0.048403 | 127669 | G | A |
| 3308 | 31427789                                                                                | 2019 | Mortality        | Long-standing illness, disability or infirmity      | 0.04845  | 377498 | G | A |

|      |          |      |              |                                                           |         |       |   |   |
|------|----------|------|--------------|-----------------------------------------------------------|---------|-------|---|---|
| 689  | 24816252 | 2014 | Metabolic    | :::X-11247                                                | 0.04854 | 7403  | A | G |
| 4610 | 31676860 | 2019 | Neurological | Cerebellar vermal lobules VIII<br>X                       | 0.04904 | 21821 | G | A |
| 645  | 24816252 | 2014 | Metabolic    | Xenobiotics::Xanthine<br>metabolism::7-<br>methylxanthine | 0.04928 | 5901  | G | A |
| 608  | 24816252 | 2014 | Metabolic    | Peptide::gamma-<br>glutamyl::gamma-<br>glutamyltyrosine   | 0.0493  | 7468  | G | A |
| 682  | 24816252 | 2014 | Metabolic    | :::X-10395                                                | 0.04999 | 7784  | A | G |
