# Supplementary material for: Epidemiologic and Genetic Associations of Endometriosis With Depression, Anxiety, and Eating Disorders
Source: PubMed Central journal article supplement (PMC9856929; doi:10.1001/jamanetworkopen.2022.51214), 2023-01-18
Supplement: jamanetwopen-e2251214-s002.pdf [file jamanetwopen-e2251214-s002.pdf]

## Data Sharing Statement

Koller. Epidemiologic and Genetic Associations of Endometriosis With Depression, Anxiety, and Eating Disorders. *JAMA Netw Open*. Published January 18, 2023.

doi:10.1001/jamanetworkopen.2022.51214

### Data

**Data available:** No

### Additional Information

**Explanation for why data not available:** The data used in this study are already publicly available. Individual-level data are available via application to UK Biobank. The other datasets are available in the following websites: MVP depression and anxiety GWAS summary statistics: [https://www.ncbi.nlm.nih.gov/projects/gap/cgi-bin/study.cgi?study\\_id=phs001672.v7.p1](https://www.ncbi.nlm.nih.gov/projects/gap/cgi-bin/study.cgi?study_id=phs001672.v7.p1) PGC anorexia nervosa GWAS summary statistics: <https://www.med.unc.edu/pgc/download-results/> FinnGen endometriosis GWAS summary statistics: <https://r6.finngen.fi/>
